# Supplementary material for: Gut Microbiome Distinguishes Patients With Epilepsy From Healthy Individuals
Source: Front Microbiol. 2022 Jan 7;12:696632. doi: 10.3389/fmicb.2021.696632 (PMC8777111; doi:10.3389/fmicb.2021.696632)
Supplement: Supplementary file 6 [file Table_5.XLS]

## Sheet: Table_5
ID	E.median	E.mean	E.se	HC.median	HC.mean	HC.se	p-value	z-score	Sig_mark	q-value	fixp	fixps
Bacteroidia	0.0193(0.0038,0.1618)	0.106993	0.0382451	0.2049(0.1127,0.2916)	0.216039	0.0228675	0.000219528	-3.69541	***	0.000695173	0.0002	***0.0002
Gammaproteobacteria	0.0279(0.0084,0.3381)	0.225994	0.0686317	0.0111(0.0042,0.0203)	0.0200809	0.00377632	0.0192309	-2.34102	*	0.0365387	0.0192	* 0.0192
Negativicutes	0.0055(0.0029,0.0131)	0.0140403	0.00497748	0.0606(0.0227,0.1658)	0.117572	0.0192773	1.9252e-08	-5.61859	***	1.82894e-07	<0.0001	***<0.0001
Actinobacteria	0.0015(0.0006,0.0063)	0.0401165	0.027934	0.0108(0.0027,0.0288)	0.0336618	0.0109454	0.000219528	-3.69541	***	0.000695173	0.0002	***0.0002
Bacilli	0.0017(0.0008,0.0074)	0.00873754	0.0034487	0.0154(0.0062,0.0245)	0.0212658	0.00314945	3.82695e-06	-4.62057	***	2.36099e-05	<0.0001	***<0.0001
Coriobacteriia	<0.0001(<0.0001,0.0001)	0.000242542	0.000162954	0.0037(0.0018,0.0064)	0.0047774	0.000675095	2.80352e-10	-6.30927	***	5.32669e-09	<0.0001	***<0.0001
Alphaproteobacteria	<0.0001(<0.0001,<0.0001)	0.00223487	0.00217714	<0.0001(<0.0001,<0.0001)	0	0	4.9705e-06	-4.56603	***	2.36099e-05	<0.0001	***<0.0001
