# Supplementary material for: Gut Microbiome Distinguishes Patients With Epilepsy From Healthy Individuals
Source: Front Microbiol. 2022 Jan 7;12:696632. doi: 10.3389/fmicb.2021.696632 (PMC8777111; doi:10.3389/fmicb.2021.696632)
Supplement: Supplementary file 9 [file Table_8.XLS]

## Sheet: Table_8
ID	E.median	E.mean	E.se	HC.median	HC.mean	HC.se	p-value	z-score	Sig_mark	q-value	fixp	fixps
Bacteroides	0.0066(0.0006,0.033)	0.0277131	0.0100658	0.0961(0.033,0.1816)	0.115495	0.0131298	7.76056e-07	-4.94129	***	2.99371e-05	<0.0001	***<0.0001
Megamonas	<0.0001(<0.0001,0.0018)	0.00652471	0.00478393	0.0112(<0.0001,0.1227)	0.0803439	0.0188479	0.0027265	-2.997	**	0.0128691	0.0027	** 0.0027
Lachnospiraceae_unclassified	0.0165(0.008,0.0357)	0.0401036	0.0112678	0.0519(0.0295,0.0723)	0.0556724	0.00472745	0.000796435	-3.35403	***	0.00587371	0.0008	***0.0008
Escherichia-Shigella	0.0097(0.001,0.0984)	0.122141	0.0517655	0.0015(0.0003,0.0045)	0.0072107	0.00267581	0.00158747	-3.1582	**	0.0085146	0.0016	** 0.0016
Blautia	0.0075(0.0039,0.0138)	0.0208538	0.00643742	0.031(0.0187,0.059)	0.0459958	0.00588068	3.1422e-05	-4.16291	***	0.000494373	<0.0001	***<0.0001
Bifidobacterium	0.0011(<0.0001,0.0061)	0.0399089	0.0279297	0.0108(0.0026,0.0287)	0.0334601	0.0109256	0.000235227	-3.67783	***	0.00213513	0.0002	***0.0002
Agathobacter	0.0052(0.0026,0.0103)	0.0214082	0.00802753	0.0281(0.0131,0.0494)	0.0323711	0.00359864	0.00189529	-3.10617	**	0.00983449	0.0019	** 0.0019
Enterobacteriaceae_unclassified	0.0043(0.0004,0.0256)	0.0607386	0.0310551	0.0001(<0.0001,0.001)	0.00385666	0.00222749	1.07138e-05	-4.40224	***	0.000194496	<0.0001	***<0.0001
Roseburia	0.002(0.0004,0.0066)	0.00734467	0.00363854	0.0099(0.0019,0.0317)	0.0225405	0.00404338	0.00262573	-3.00846	**	0.0128691	0.0026	** 0.0026
Lachnoclostridium	0.0008(0.0005,0.0044)	0.0259639	0.0212046	0.0051(0.0026,0.0098)	0.0117857	0.00279743	8.59327e-05	-3.92722	***	0.00115223	<0.0001	***<0.0001
Anaerostipes	0.0009(0.0002,0.0018)	0.0214967	0.0153584	0.0036(0.001,0.012)	0.0136486	0.00606951	0.0038911	-2.88686	**	0.0170055	0.0039	** 0.0039
[Ruminococcus]_torques_group	0.0005(0.0002,0.0025)	0.00323754	0.00137007	0.0116(0.0048,0.0262)	0.0223817	0.00444776	3.2578e-08	-5.52699	***	1.9221e-06	<0.0001	***<0.0001
Dialister	<0.0001(<0.0001,0.0018)	0.00407471	0.00198447	0.0069(<0.0001,0.0405)	0.0208427	0.00405124	0.0373454	-2.08197	*	0.10329	0.0373	* 0.0373
Halomonas	<0.0001(<0.0001,0.0002)	0.0392908	0.0385432	<0.0001(<0.0001,<0.0001)	1.5e-06	1.05453e-06	5.704e-08	-5.42784	***	2.69229e-06	<0.0001	***<0.0001
Dorea	0.0019(0.0007,0.0055)	0.00760017	0.00301951	0.012(0.0066,0.0184)	0.0141688	0.00179369	0.0003773	-3.55547	***	0.00307044	0.0004	***0.0004
Alistipes	0.0001(<0.0001,0.0014)	0.00515983	0.00339312	0.0043(0.0006,0.0163)	0.011632	0.00273363	0.000857249	-3.33362	***	0.00613063	0.0009	***0.0009
Coprococcus	0.0018(0.0001,0.0056)	0.00465154	0.0013885	0.0056(0.0034,0.0118)	0.0107937	0.00185146	0.00519668	-2.79458	**	0.0215161	0.0052	** 0.0052
Lachnospira	0.0003(<0.0001,0.0007)	0.00067025	0.000208913	0.0045(0.0011,0.0127)	0.00991864	0.0020996	1.02242e-05	-4.41238	***	0.000194496	<0.0001	***<0.0001
Fusicatenibacter	0.0012(0.0002,0.0036)	0.00328017	0.00128027	0.0049(0.0014,0.0102)	0.00818498	0.00142769	0.00271478	-2.99831	**	0.0128691	0.0027	** 0.0027
Phascolarctobacterium	0.0002(<0.0001,0.0011)	0.000994125	0.000342666	0.002(0.0003,0.0071)	0.00911938	0.0025256	0.0010907	-3.26602	**	0.00660012	0.0011	** 0.0011
Romboutsia	0.0004(0.0002,0.0009)	0.00206425	0.00116869	0.001(0.0003,0.0047)	0.00852312	0.00367815	0.0274126	-2.20559	*	0.0840177	0.0274	* 0.0274
Erysipelotrichaceae_UCG-003	0.0002(<0.0001,0.0008)	0.00523054	0.00294437	0.0033(0.0012,0.007)	0.00679654	0.00164622	0.000968216	-3.2996	***	0.00631607	0.001	***0.001
Parabacteroides	<0.0001(<0.0001,0.0002)	0.00149658	0.000859083	0.004(0.0009,0.0084)	0.00797434	0.00201902	1.12118e-06	-4.86908	***	3.30747e-05	<0.0001	***<0.0001
Streptococcus	0.0002(<0.0001,0.0014)	0.00141487	0.000564329	0.0021(0.0007,0.0076)	0.00619262	0.00150121	0.000125973	-3.8342	***	0.00135134	0.0001	***0.0001
[Eubacterium]_hallii_group	0.0009(0.0001,0.003)	0.00241125	0.000905079	0.0031(0.0014,0.0074)	0.00524416	0.000787107	0.00439799	-2.84811	**	0.0188057	0.0044	** 0.0044
Butyricicoccus	0.0002(<0.0001,0.0004)	0.000461375	0.000149445	0.004(0.0021,0.0063)	0.00563336	0.000859431	7.7634e-10	-6.14969	***	9.16081e-08	<0.0001	***<0.0001
Clostridia_unclassified	0.0062(0.0017,0.016)	0.00931017	0.00195398	0.0012(0.0005,0.0019)	0.0012743	0.000151167	9.27645e-05	-3.90878	***	0.00115223	<0.0001	***<0.0001
Lachnospiraceae_NK4A136_group	0.0006(<0.0001,0.0012)	0.00155775	0.000670432	0.0012(0.0006,0.0043)	0.0041368	0.000949855	0.0149815	-2.43283	*	0.0512412	0.015	* 0.015
Monoglobus	0.0002(<0.0001,0.0015)	0.00133217	0.000415725	0.0016(0.0004,0.0048)	0.00404052	0.000847695	0.00609819	-2.74245	**	0.0248133	0.0061	** 0.0061
Parasutterella	<0.0001(<0.0001,<0.0001)	0.00176917	0.00149636	0.0006(0.0001,0.0026)	0.0031982	0.000886683	5.32014e-05	-4.0411	***	0.000784721	<0.0001	***<0.0001
Collinsella	<0.0001(<0.0001,<0.0001)	0.000180333	0.000162881	0.0026(0.0013,0.0047)	0.00392286	0.000624659	2.64952e-08	-5.56315	***	1.9221e-06	<0.0001	***<0.0001
[Eubacterium]_ventriosum_group	<0.0001(<0.0001,0.0003)	0.000277875	9.20068e-05	0.0018(0.0004,0.0045)	0.00353226	0.000642577	8.87965e-07	-4.91497	***	2.99371e-05	<0.0001	***<0.0001
Lactobacillus	<0.0001(<0.0001,0.0005)	0.000840083	0.000370527	<0.0001(<0.0001,<0.0001)	0.00277956	0.00168321	0.0420163	-2.03336	*	0.10329	0.042	* 0.042
Ruminococcaceae_Incertae_Sedis	0.0002(<0.0001,0.0008)	0.00308642	0.00241902	0.0009(0.0006,0.0022)	0.00166792	0.000267526	0.00145999	-3.18252	**	0.00840387	0.0015	** 0.0015
Lachnospiraceae_CAG-56	0.0003(<0.0001,0.0005)	0.0006585	0.000330204	0.001(0.0002,0.0035)	0.00283286	0.000609876	0.00346062	-2.92355	**	0.0154095	0.0035	** 0.0035
Haemophilus	<0.0001(<0.0001,<0.0001)	8.20833e-05	3.21143e-05	0.0001(<0.0001,0.0016)	0.00296636	0.00124249	0.0216227	-2.29693	*	0.0680394	0.0216	* 0.0216
Tyzzerella	<0.0001(<0.0001,0.0003)	0.0002165	7.49121e-05	0.0002(<0.0001,0.0019)	0.0025108	0.000863569	0.0358553	-2.09856	*	0.100736	0.0359	* 0.0359
Oscillospiraceae_UCG-003	<0.0001(<0.0001,0.0004)	0.000299792	0.000104362	0.0007(<0.0001,0.0023)	0.00214042	0.000632555	0.00150552	-3.17362	**	0.00845961	0.0015	** 0.0015
Sutterella	<0.0001(<0.0001,<0.0001)	9.57083e-05	5.50712e-05	0.0007(<0.0001,0.003)	0.0021756	0.000444571	0.000104129	-3.88076	***	0.00119382	0.0001	***0.0001
Oscillospirales_unclassified	0.0007(<0.0001,0.0061)	0.00378275	0.00118254	0.0002(<0.0001,0.0004)	0.00031006	6.19929e-05	0.011309	-2.533	*	0.0421177	0.0113	* 0.0113
Oscillibacter	<0.0001(<0.0001,0.0001)	0.000705625	0.000381502	0.0002(<0.0001,0.0016)	0.00168872	0.000633752	0.0114866	-2.52754	*	0.0421177	0.0115	* 0.0115
Barnesiella	<0.0001(<0.0001,<0.0001)	0.000217583	0.000175972	<0.0001(<0.0001,0.0011)	0.00140948	0.00045158	0.00730931	-2.68241	**	0.02875	0.0073	** 0.0073
Paraprevotella	<0.0001(<0.0001,<0.0001)	4.43333e-05	1.76778e-05	<0.0001(<0.0001,0.0011)	0.00114808	0.000331488	0.0470099	-1.98621	*	0.114374	0.047	* 0.047
Flavonifractor	<0.0001(<0.0001,0.0003)	0.000247917	7.32914e-05	0.0003(0.0001,0.001)	0.00098604	0.000323741	0.012591	-2.49513	*	0.0450224	0.0126	* 0.0126
Pelagibacterium	<0.0001(<0.0001,<0.0001)	0.00133971	0.00130307	<0.0001(<0.0001,<0.0001)	0	0	1.92332e-05	-4.27361	***	0.000324217	<0.0001	***<0.0001
Rhizobiaceae_unclassified	<0.0001(<0.0001,<0.0001)	0.000728833	0.000710467	<0.0001(<0.0001,<0.0001)	0	0	0.00095366	-3.30385	***	0.00631607	0.001	***0.001
Tannerellaceae_unclassified	<0.0001(<0.0001,<0.0001)	5.5e-06	4.50161e-06	<0.0001(<0.0001,<0.0001)	0.00030736	0.000208142	0.00446238	-2.84348	**	0.0188057	0.0045	** 0.0045
Xanthomonadaceae_unclassified	<0.0001(<0.0001,<0.0001)	0.000552458	0.0005421	<0.0001(<0.0001,<0.0001)	0	0	0.00336996	-2.93181	**	0.0152944	0.0034	** 0.0034
